# Supplementary material for: Magnetic response of photonic crystals based on nucleating agents of binuclear complexes
Source: Royal Society of Chemistry journal article supplement (doi:10.1039/d3tc02786d), 2023-01-01
Supplement: d3tc02786d1.pdf [file d3tc02786d1.pdf]

## Supporting Information

### Magnetic Response Photonic Crystals Based on Nucleating Agents of Binuclear Complexes

*Mengdong Tu, Mengying Xu, Xi Wei, Depeng Gong, Jun Chen, Chaocan Zhang\**

School of Materials Science and Engineering, Wuhan University of Technology, Wuhan,  
430070, China

E-mail: [polymers@whut.edu.cn](mailto:polymers@whut.edu.cn)

### Experiments Section

**Materials.** Ethylene glycol (EG,  $\geq 99.5\%$ ), Ethanol ( $\geq 99.7\%$ ), anhydrous ferric chloride ( $\text{FeCl}_3$ ,  $\geq 97.0\%$ ;  $\text{FeCl}_2$ ,  $\leq 1.0\%$ ), anhydrous sodium acetate (NaAc,  $\geq 99.0\%$ ), sodium hydroxide (NaOH,  $\geq 96.0\%$ ), were purchased from Sinopharm Chemical Reagent Co.,Ltd. Poly(4-styrenesulfonic acid-co-maleic acid) sodium salt (PSSMA,  $M_w \approx 20000$ , SS: MA=1:1), anhydrous ferric chloride ( $\text{FeCl}_2$   $\geq 99.5\%$ ) were purchased from Shanghai Aladdin Biochemical Technology Co.,Ltd. Ethylene glycol was predried by enough molecular sieve (type 3A) while other chemicals were used as received.

**Synthesis of Monodispersed Fe<sub>3</sub>O<sub>4</sub> Nanoparticles.** In a typical experiment, 0.65 g anhydrous FeCl<sub>3</sub> was dissolved in ethylene glycol (40 mL) under the magnetic stirring, then a certain volume of hydrogen peroxide, 1.0 g PSSMA, and 3.0 g anhydrous NaAc were added to form a mixed solution. The mixing process was conducted in a 50 °C water bath. Subsequently, a specific amount of FeCl<sub>2</sub> was added to the mixed solution under a nitrogen atmosphere. Afterward, 0.6 g of NaOH was added to form an even solution. The as-received solution was transferred to a Teflon-lined stainless-steel autoclave and heated at 190 °C for 9 h. After the reaction, when cooled to room temperature, the dark precipitates were isolated by a magnet and washed three times with a 30 mL mixture ( $V_{\text{Ethanol}}: V_{\text{Distilled water}}=1:1$ ) and 30 mL Distilled water.

**Configuration of the instrument.** Transmission electron microscope(TEM) images were taken on JEOL JEM-2100F, Test conditions: accelerating voltage: 80kV~200 kV, maximum resolution: 0.1nm. X-ray diffraction(XRD) analysis was carried out on a D8 Advance X-ray diffractometer ( $\lambda=1.5418 \text{ \AA}$ ) in the  $2\theta$  range of 10-80° using Cu-K $\alpha$  radiation. Operating voltage 40kV, operating scanning speed 5°/min. X-ray photoelectron spectrometry(XPS) analysis was performed using a Thermo ESCALAB 250Xi multifunctional imaging electron spectrometer manufactured by Thermo Fisher Scientific. The X-ray source was a monochromatic K $\alpha$ -rays of Al ( $h\nu=1486.6 \text{ eV}$ ) with an operating voltage of 15 kV, a power of 150 W, and a beam spot of 500  $\mu\text{m}$ . Fourier transform infrared spectrum(FTIR) was obtained using a Thermo Fisher Nicolet 6700 FTIR spectrometer in the range of 400-4000  $\text{cm}^{-1}$  with a resolution of 4  $\text{cm}^{-1}$ . Ultraviolet-Visible absorption spectrum(UV) was collected using a Macylab Instruments UV-1500PC spectrometer. The wavelength range is 200 nm to 800 nm. Magnetic properties were tested using a LakeShore 7404 Vibrating Sample Magnetometer(VSM) at room temperature with an applied magnetic field from -6k Oe to 6k Oe. Reflectance spectroscopy tests were performed using an American Ocean

Optics spectrometer USB2000+ with a wavelength range of 300-1000 nm and a resolution of 0.30 nm, and the spectrometer was calibrated with a standard white board before use. Particle size was analyzed using a Zetasizer Nano Series Dynamic Light Scattering (DLS) instrument from Malvern instruments Co.

## Figure section

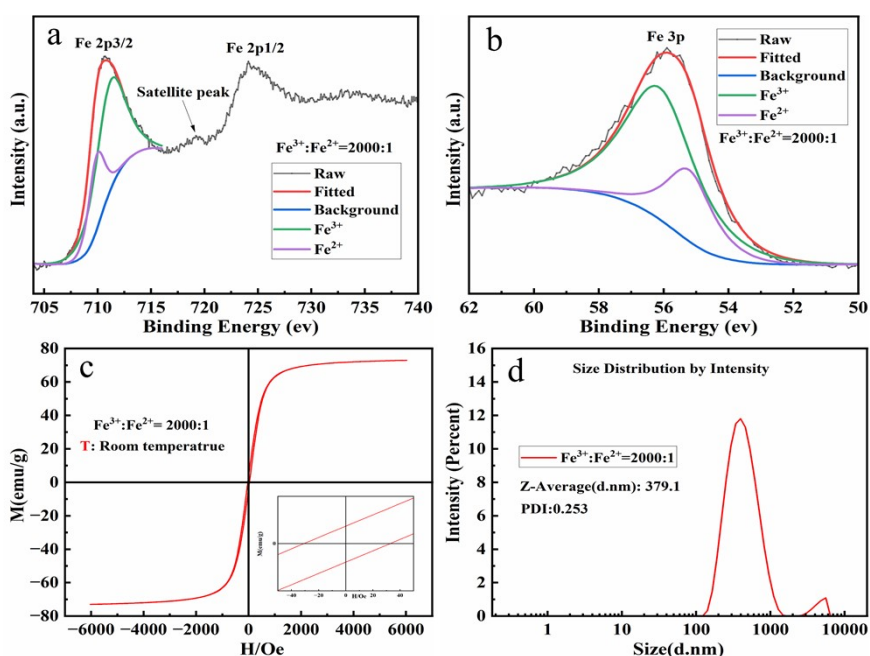

**Fig. S1** XPS patterns of Sample 2 (Fe<sup>3+</sup>:Fe<sup>2+</sup> = 2000:1). (a) Fe 2p, (b) Fe 3p. (c) Room temperature magnetization curve of Sample 2. (d) Particle size distribution curve of Sample 2. The XPS Fe 2p spectrum showed that Sample 2 exhibited a satellite peak of  $\gamma$ -Fe<sub>2</sub>O<sub>3</sub>, and The relative areas of the resulting deconvoluted peaks assigned to Fe<sup>3+</sup> and Fe<sup>2+</sup> were calculated to be nearly 2.8:1 in Fe 2p and 3p spectrum (Fig. S1a, S1b). The sample also contained a small amount of micron-sized agglomerates, showing some soft magnetic properties with coercivity and remanent magnetization value of 32.1 Oe and 3.6 emu/g (Fig. S1c, S1d).

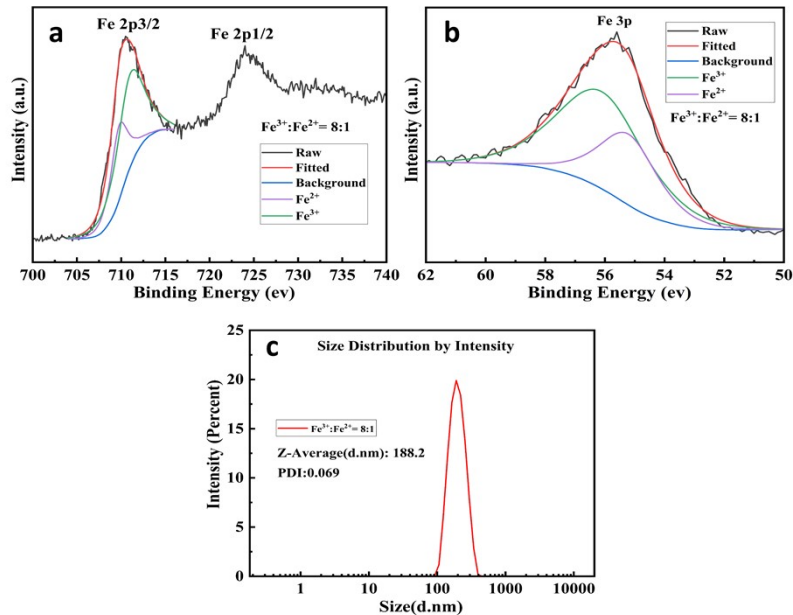

**Fig. S2** XPS patterns of Sample 7 ( $\text{Fe}^{3+}:\text{Fe}^{2+} = 8:1$ ). (a) Fe 2p, (b) Fe 3p. (c) Particle size distribution curve of sample 7. The XPS Fe 2p spectrum showed that Sample 7 did not present a satellite peak of  $\gamma\text{-Fe}_2\text{O}_3$ , and the ratio of peak area corresponding to  $\text{Fe}^{3+}$  to  $\text{Fe}^{2+}$  was calculated to be 2:1 in Fe 2p and 3p spectrum (Fig. S2a, S2b), and the sample demonstrated the superparamagnetic behavior (Fig. S2c).

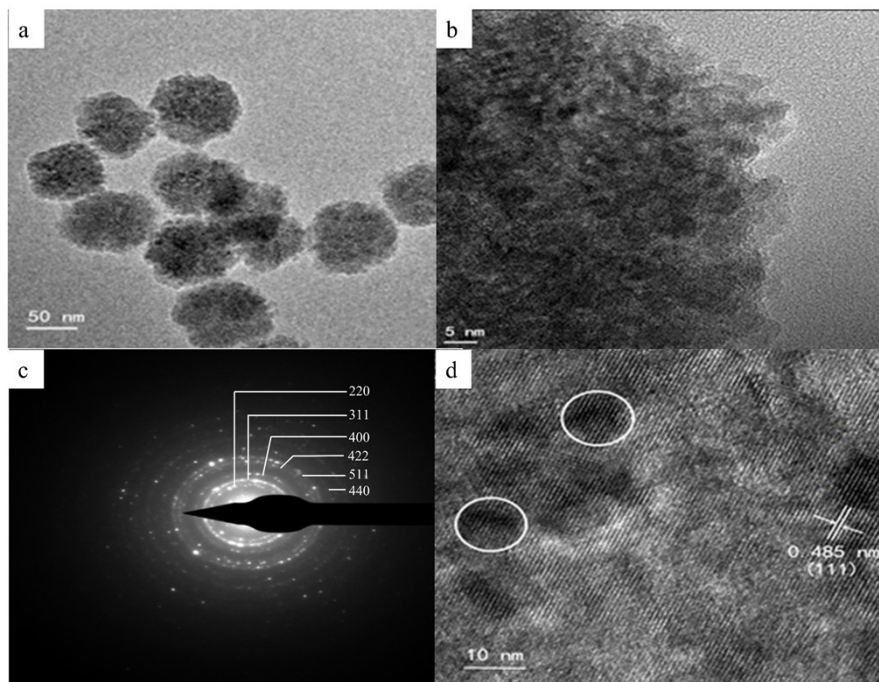

**Fig. S3** (a) TEM image of the product nano  $\text{Fe}_3\text{O}_4$  with  $\text{Fe}^{3+}/\text{Fe}^{2+}$  ratio of 2:1 in the precursor, (b) TEM image at higher magnification, (c) Selected-area electron diffraction (SAED) pattern, (d) HRTEM image. As can be seen in Figure Above, the product  $\text{Fe}_3\text{O}_4$  was nearly spherical and uniform in size with an average particle size of 75 nm (Fig. S3a). A TEM image at higher magnification revealed that the nanoparticles were composed of nanocrystals with a smaller size (Fig. S3b). The SAED pattern showed their electron diffraction pattern as a series of concentric diffraction rings, indicating that the products were polycrystalline in structure (Fig. S3c). The HRTEM image exhibited that the lattice stripe spacing in d was 0.485 nm, which was consistent with the peak 111 crystal plane spacing (Fig. S3d).

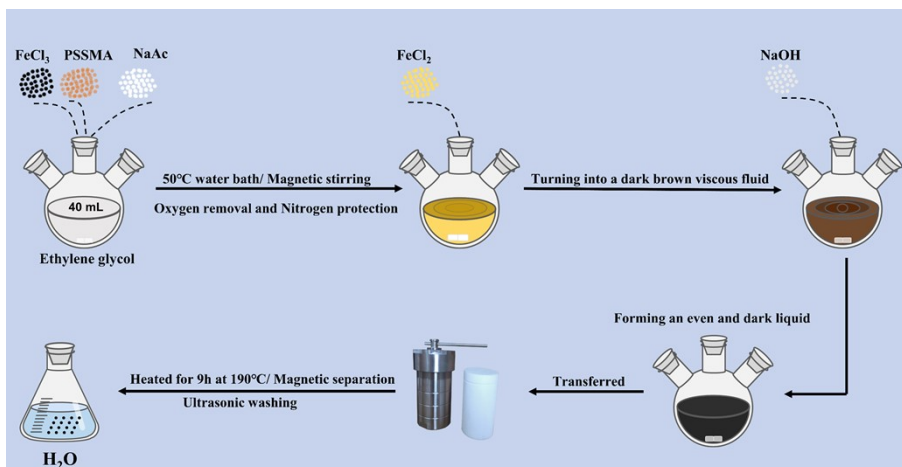

**Fig. S4** Flowchart of the experimental preparation.

## Videos section

**Video S1:** No  $\text{Fe}^{2+}$  in the precursor, and the product is not magnetochromic.

**Video S2:** Magnetochromic product, the precursor contains a certain amount of  $\text{Fe}^{2+}$ .
